# Supplementary material
Source: Springer Nature journal article supplement (https://www.springermedizin.de/resource/supplementary/12873_2013_196_MOESM1_ESM.pdf/9431600)
Supplement: MOESM1 [file 9431600]

## **Additional File 1**

### **Emergency Medical Technician – CPC Questionnaire**

Please tick the boxes as appropriate in answer to the following questions

1. Are you currently registered as an EMT with PHECC?  
  
Yes    No
2. How long have you been registered as an EMT?  
Up to 1 year    1 up to 2 years    2 to up to-3 years    3 to up to 5 years    5 years or more
3. Registration with PHECC as a pre-hospital practitioner is of personal importance to you.  
Strongly Agree   Agree   Undecided   Disagree   Strongly Disagree
4. Which Organisation are you a member (employee) of?  
Civil Defence   Order of Malta   St. John Ambulance Brigade   Irish Red Cross  
Permanent Defence Forces   Private Ambulance Service  
Other                      (please state name of organisation)
5. How many years have you been with this organisation?  
0-5    6-10    11-15    16-20    over 20
6. Please select your appropriate age group.  
18-21    22-26    27-30    31-35    36-40    41-45    46-50    over 50
7. Gender  
Male    Female

The Term 'Continuous Professional Competence '(CPC) refers to activities that contribute to your professional development by being able to demonstrate competency related to your EMT status.

PHECC intend to introduce CPC across all registration levels. The registered practitioner must show evidence of CPC to maintain their registration as an EMT. Please answer the following questions relating to CPC.

Please give your opinion on the statements were given

8. It is right that evidence of Continuous professional competence is a condition for PHECC registration as an EMT.

Strongly Agree      Agree      Undecided      Disagree      Strongly Disagree

9. It is the sole responsibility of the registered practitioner to maintain their own CPC.

Strongly Agree      Agree      Undecided      Disagree      Strongly Disagree

10. Should your organisation have input into what components should make-up an individual's CPC?

Yes      To some extent      No      Not sure

11. Your CPC portfolio, or record of CPC evidence, should be available for audit by your Organisation.

Strongly Agree      Agree      Undecided      Disagree      Strongly Disagree

12. Only PHECC should determine what components make-up and individual's CPC.

Strongly Agree      Agree      Undecided      Disagree      Strongly Disagree

13. PHECC, your organisation and the registered practitioner should decide on the activities that may be used for CPC.

Strongly Agree      Agree      Undecided      Disagree      Strongly Disagree

14. CPC is extremely important to me as a registered pre-hospital practitioner.

Strongly Agree      Agree      Undecided      Disagree      Strongly Disagree

15. To ensure registration, all EMTs should maintain evidence of CPC activities.

Strongly Agree      Agree      Undecided      Disagree      Strongly Disagree

16. EMTs who do not maintain their continuous professional competence, and who continue not to meet the requirements, should not be allowed to re-register.

Strongly Agree      Agree      Undecided      Disagree      Strongly Disagree

A professional portfolio is a personal collection of evidence which demonstrates the continuing acquisition of skills, knowledge, attitudes, understanding and achievements.

17. Do you maintain a professional portfolio?

Yes                  No

18. Please indicate the number of CPC hours you have recorded over the last 12 months

None < 20 hrs          21-40 hrs          41-60hrs          61-80hrs          81-100hrs  
>100hrs

19. If you have completed CPC activities in the previous 12 month period who funded it?

Not completed CPC          Self funded          Funded by Organisation

Partially funded by Organisation          CPC activities provided Free of charge

20. How many hours of CPC activities do you think would be appropriate in a 12 month period for EMTs? Please give ranges here.

21. Please indicate how relevant you believe the activities listed below are to you maintaining your Continuous Professional Competence.

**(for all) Very relevant      relevant      Undecided      not relevant  
very irrelevant**

Training on a simulation manikin  
 Relevant Conferences e.g RESUS  
 Regular practical assessments  
 Project work  
 Practical Training scenarios  
 Mentoring others  
 Major Incident/Emergency exercises  
 Lecturing/teaching  
 Keeping a portfolio of CPC activities  
 First Aid Competitions  
 e-learning modules only and no related practice  
 Doing a duty with paramedics/advanced paramedics  
 Case Study review  
 Being an examiner  
 Being a Tutor  
 Attending courses accredited by PHECC  
 Appraisal with senior EMT Officer (or above)  
 Appraisal with a Doctor/medical supervisor  
 Appraisal of journal publications  
 Annual Cardiac First Response/CPR revalidation  
 Access to medical journals/medical books  
 Access to e-learning followed by related practice

22. Your Organisation only should decide what activities you must do for CPC each year.

Strongly Agree      Agree      Undecided      Disagree      Strongly Disagree

23. You and your Organisation should have input into what CPC activities are required each year.

Strongly Agree      Agree      Undecided      Disagree      Strongly Disagree

24. Your organisation should have no input at all into deciding what constitutes CPC.

Strongly Agree      Agree      Undecided      Disagree      Strongly Disagree

25. PHECC should require a minimum of standard CPC activities, such as completed patient care reports, evidence of cardiac first response revalidation, evidence of managing patients, but other activities should be allowed if considered relevant by the practitioner.

Strongly Agree      Agree      Undecided      Disagree      Strongly Disagree
